# Supplementary material for: GpsB Coordinates Cell Division and Cell Surface Decoration by Wall Teichoic Acids in Staphylococcus aureus
Source: PubMed Central journal article supplement (PMC9241681; doi:10.1128/spectrum.01413-22), 2022-06-01
Supplement: spectrum.01413-22-s0001.pdf [file spectrum.01413-22-s0001.pdf]

## Supplemental Information

### **GpsB coordinates cell division and cell surface decoration by wall teichoic acids in *Staphylococcus aureus***

Lauren R. Hammond<sup>1^</sup>, Michael D. Sacco<sup>2^</sup>, Sebastian J. Khan<sup>1</sup>, Catherine Spanoudis<sup>1</sup>, Abigail Hough<sup>1</sup>, Yu Chen<sup>2</sup> and Prahathees J. Eswara<sup>1\*</sup>

<sup>1</sup> Department of Cell Biology, Microbiology and Molecular Biology, University of South Florida, Tampa, Florida, USA

<sup>2</sup> Department of Molecular Medicine, University of South Florida, Tampa, Florida, USA

<sup>^</sup>LH and MS contributed equally. Author order determined by the seniority of involvement in this project.

<sup>\*</sup>To whom correspondence should be addressed. Email: [eswara@usf.edu](mailto:eswara@usf.edu)

## Supplemental Table and Figure Legends

### Figure S1

(A) Stable production of \*GpsB<sup>SA</sup>-GFP was confirmed with western blot analysis of PY79 *B. subtilis* cells expressing *gpsB<sup>SA</sup>-gfp* (GG8) or \**gpsB<sup>SA</sup>-gfp* (CS89-CS93, PE377, PE448) both with and without the addition of 1 mM IPTG. Cleavage product is denoted by \*. (B) The L35S \*GpsB-GFP (PE448) mutation shows a cleavage product detected via western blot (as denoted by \*). GpsB<sup>SA</sup>-GFP (GG8) and free GFP (RL4709) are shown for comparison. Blots probed with anti-GFP antibodies and anti-sigA for a loading control. (C) Localization of GpsB<sup>SA</sup>-GFP (i) (GG8) and \*GpsB<sup>SA</sup>-GFP (ii – viii) (CS89-CS93, PE377, PE448) in *B. subtilis* PY79 cells. Images taken 3 h after the addition of 1 mM IPTG and membranes were visualized with SynaptoRed membrane dye. Scale bar is 1  $\mu$ m.

### Figure S2

Investigation of \*GpsB dominant negative phenotypes. (A) Spot titer assay with *B. subtilis* PY79 cells co-expressing *gpsB<sup>SA</sup>-gfp* (LH73) and one of the \**gpsB<sup>SA</sup>-gfp* intragenic suppressor mutations (LH75-LH80). Cultures were serially diluted and spotted onto plates in the absence (left) and presence (right) of 1 mM IPTG. (B) BACTH assay testing pairwise interactions of T18 - \*GpsB<sup>SA</sup> (LH43, LH45, LH47, LH49, LH51, LH53, LH55) with WT T25- GpsB<sup>SA</sup> (LH40) and the negative (PE83/PE84; Neg) and positive (PE87/PE88; Pos) controls. Interactions on solid media with a dark pink color indicating a positive interaction. Image taken after 48 h of incubation (top).  $\beta$  galactosidase assay testing the same pairwise interactions. Bars show calculated Miller units

with the dashed line marking the cutoff from the negative control (bottom). Error bars show standard deviation. (C) Spot titer assay of RN4220 *S. aureus* cells harboring \*GpsB<sup>SA</sup>-GFP mutations (PE355, GGS2, LH17-LH20, LH32, LH35, LH36) and plated on media containing 1 mM IPTG. (D) Production of GpsB<sup>SA</sup>-GFP (LH141) and \*GpsB<sup>SA</sup>-GFP (LH142-LH144, LH159-LH162) in *S. aureus* RN4220  $\Delta spa$  cells. Blots were probed with antibody raised against GpsB<sup>SA</sup>-GFP and a total protein stained gel was used as a loading control.

### Figure S3

Superimposition of the crystal structures of *S. pneumoniae* (PDB ID 6GQA), *B. subtilis* (PDB ID 4UG3), *L. monocytogenes* (PDB ID 4UG1), GpsB and the *S. aureus* homology model. (A) Side view. (B) Top view. (C) The equivalent of *S. aureus* D41 is strictly conserved in *S. pneumoniae*, *B. subtilis*, and *L. monocytogenes*, where it functions as a hydrogen bond acceptor for three residues. These interactions are an important force that stabilizes this region. The subscripts A and B denote the two protomers in the dimer.

### Figure S4

Homology model of *S. aureus* GpsB. The N-terminal LEELR section of  $\alpha$ -helix 2 with (a) native and (b) inserted LEE residues colored in yellow.

### Figure S5

(A)  $\beta$  galactosidase assay testing pairwise interactions of GpsB<sup>SA</sup> (LH39-LH40) with TarG (SKB1-SKB2) and TarH (SKB3-SKB4). Bars show calculated Miller units with the dashed line marking the cutoff from the negative control. (B) *S. aureus* cell lysates of GpsB<sup>SA</sup>-FLAG (LH38)

and GFP-TarG<sup>SA</sup> (LH136) were combined and subjected to co-immunoprecipitation assay. Load (lysate), flow through, wash 1, wash 2, wash 3, and eluate fractions were subjected to immunoblotting. (C) Purified WTA extracts from strains of SH1000 *S. aureus* cells containing the empty vector (EV; PES5) or a plasmid for *gpsB*<sup>SA</sup> overexpression (PES13). Cells were grown to mid-log phase and then induced with 1 mM IPTG for 3 h prior before collection and extraction of WTAs. Extracts were analyzed via electrophoresis on a native PAGE gel and visualized through Alcian blue and silver staining. (D) Fluorescence micrographs showing localization of GFP-TarG in RN4220 *S. aureus* cells (LH136) imaged at mid-log phase with no inducer added. Scale bar 1  $\mu$ m. (E) Measurement of autolysis in strains overproducing GpsB<sup>SA</sup> (GGS1) and GpsB<sup>ΔLEE</sup> (AH2) and an empty vector control (PE355) both with and without treatment of 5  $\mu$ g/ml targocil. (F) Immunoblot of *E. coli* cell lysates harboring plasmids containing T18-GpsB (LH39) and T18- $\Delta$ LEE (LH47) were probed with anti-GpsB antibody. Coomassie-stained gel of total protein served as a loading control.

#### Figure S6

Multiple sequence alignments of (A) TagH/TarH and (B) TagG/TarG of *Bacillus subtilis* (Bs), *Staphylococcus aureus* (Sa), *Enterococcus faecalis* (Ef), and *Listeria monocytogenes* (Lm) are shown. The alignment was generated using Clustal Omega. The residues mutated in the extragenic suppressors of *B. subtilis* TagH/TagG shown in Fig. 4A are highlighted.

#### Table S1

Strains and oligonucleotides used in this study.

**A**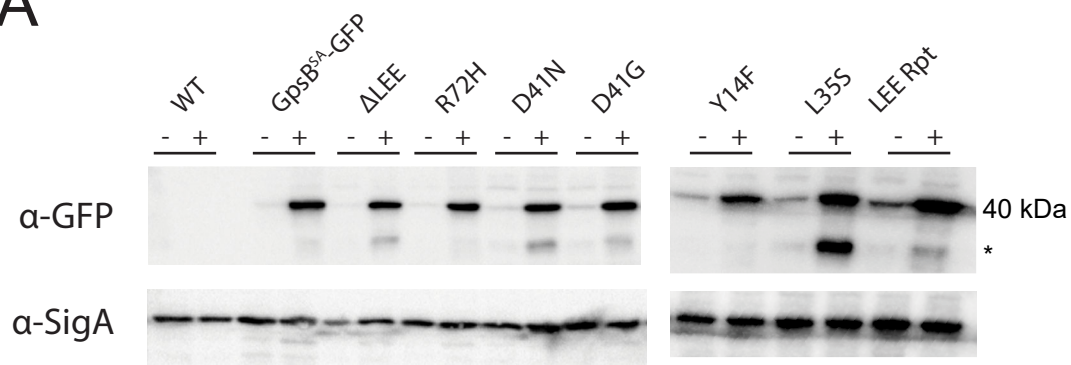**B**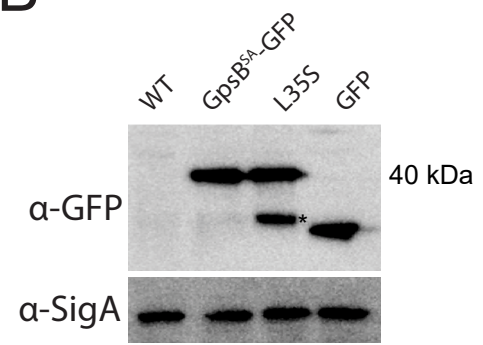**C**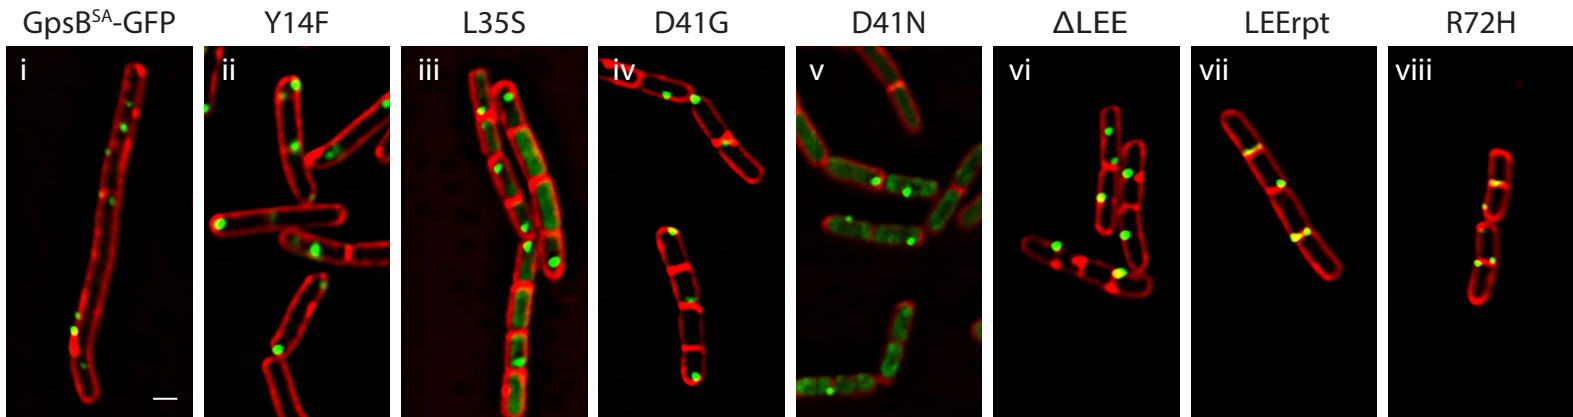

**A**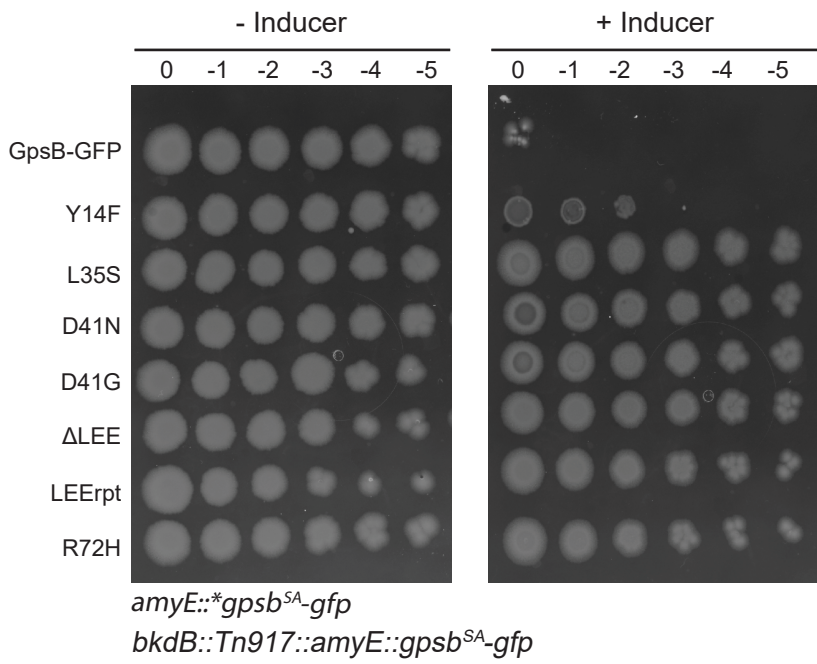**B**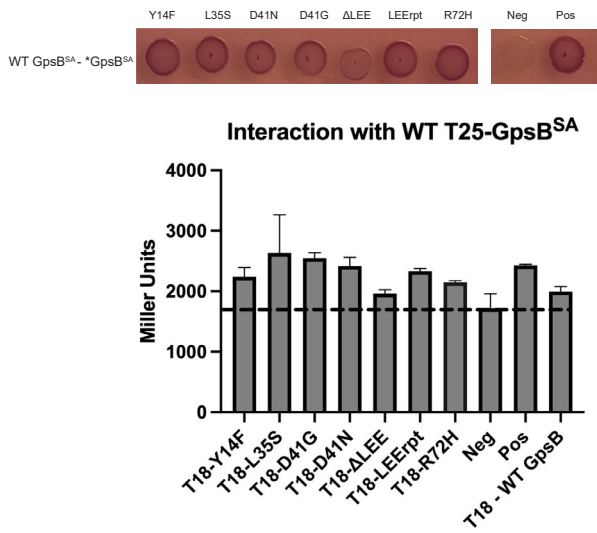**C**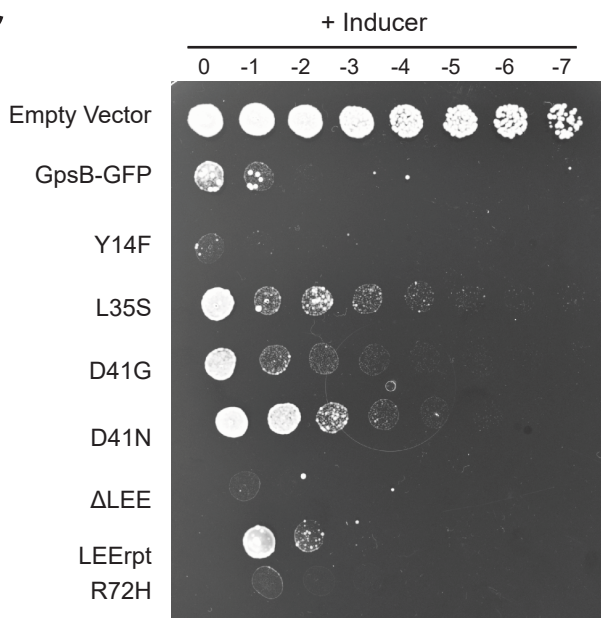**D**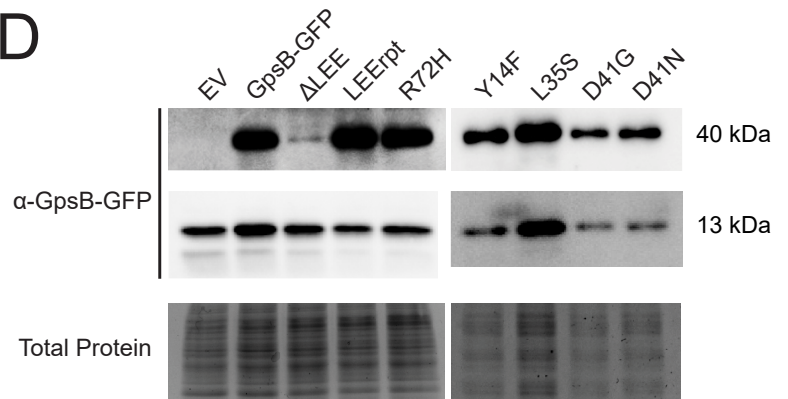

A

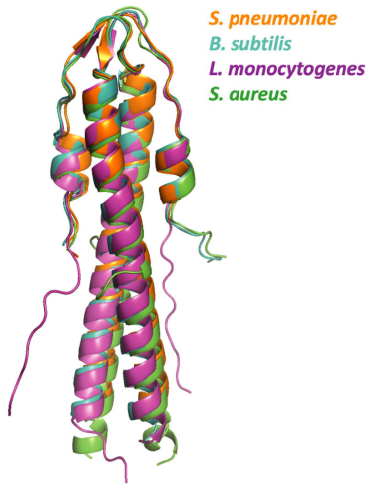

B

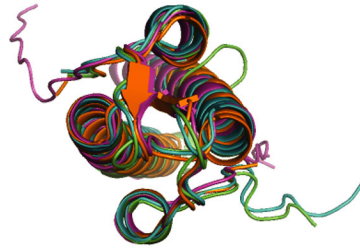

C

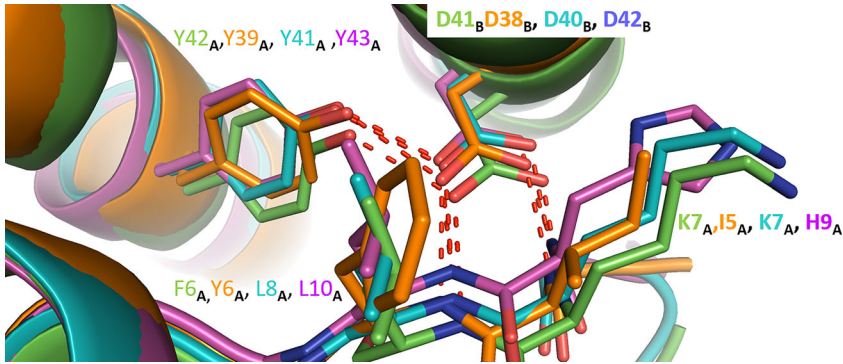

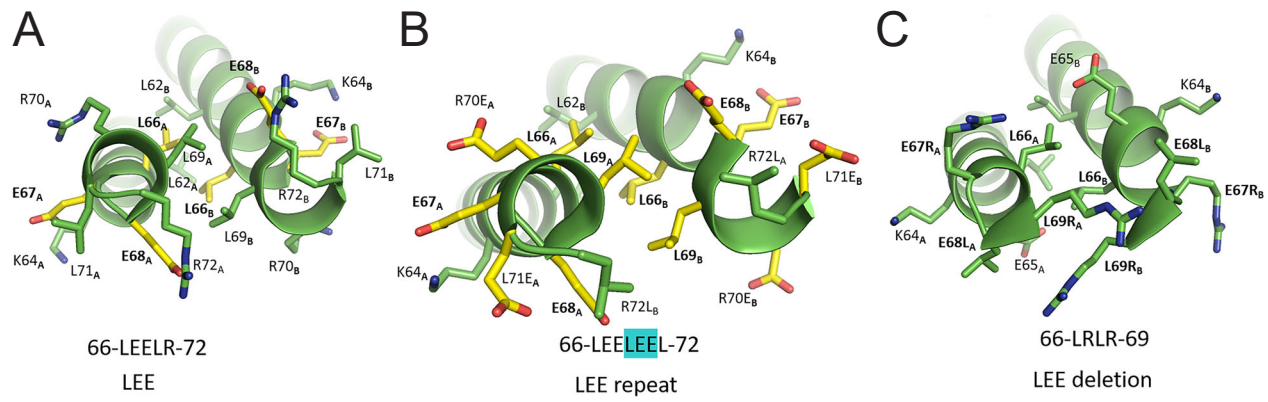



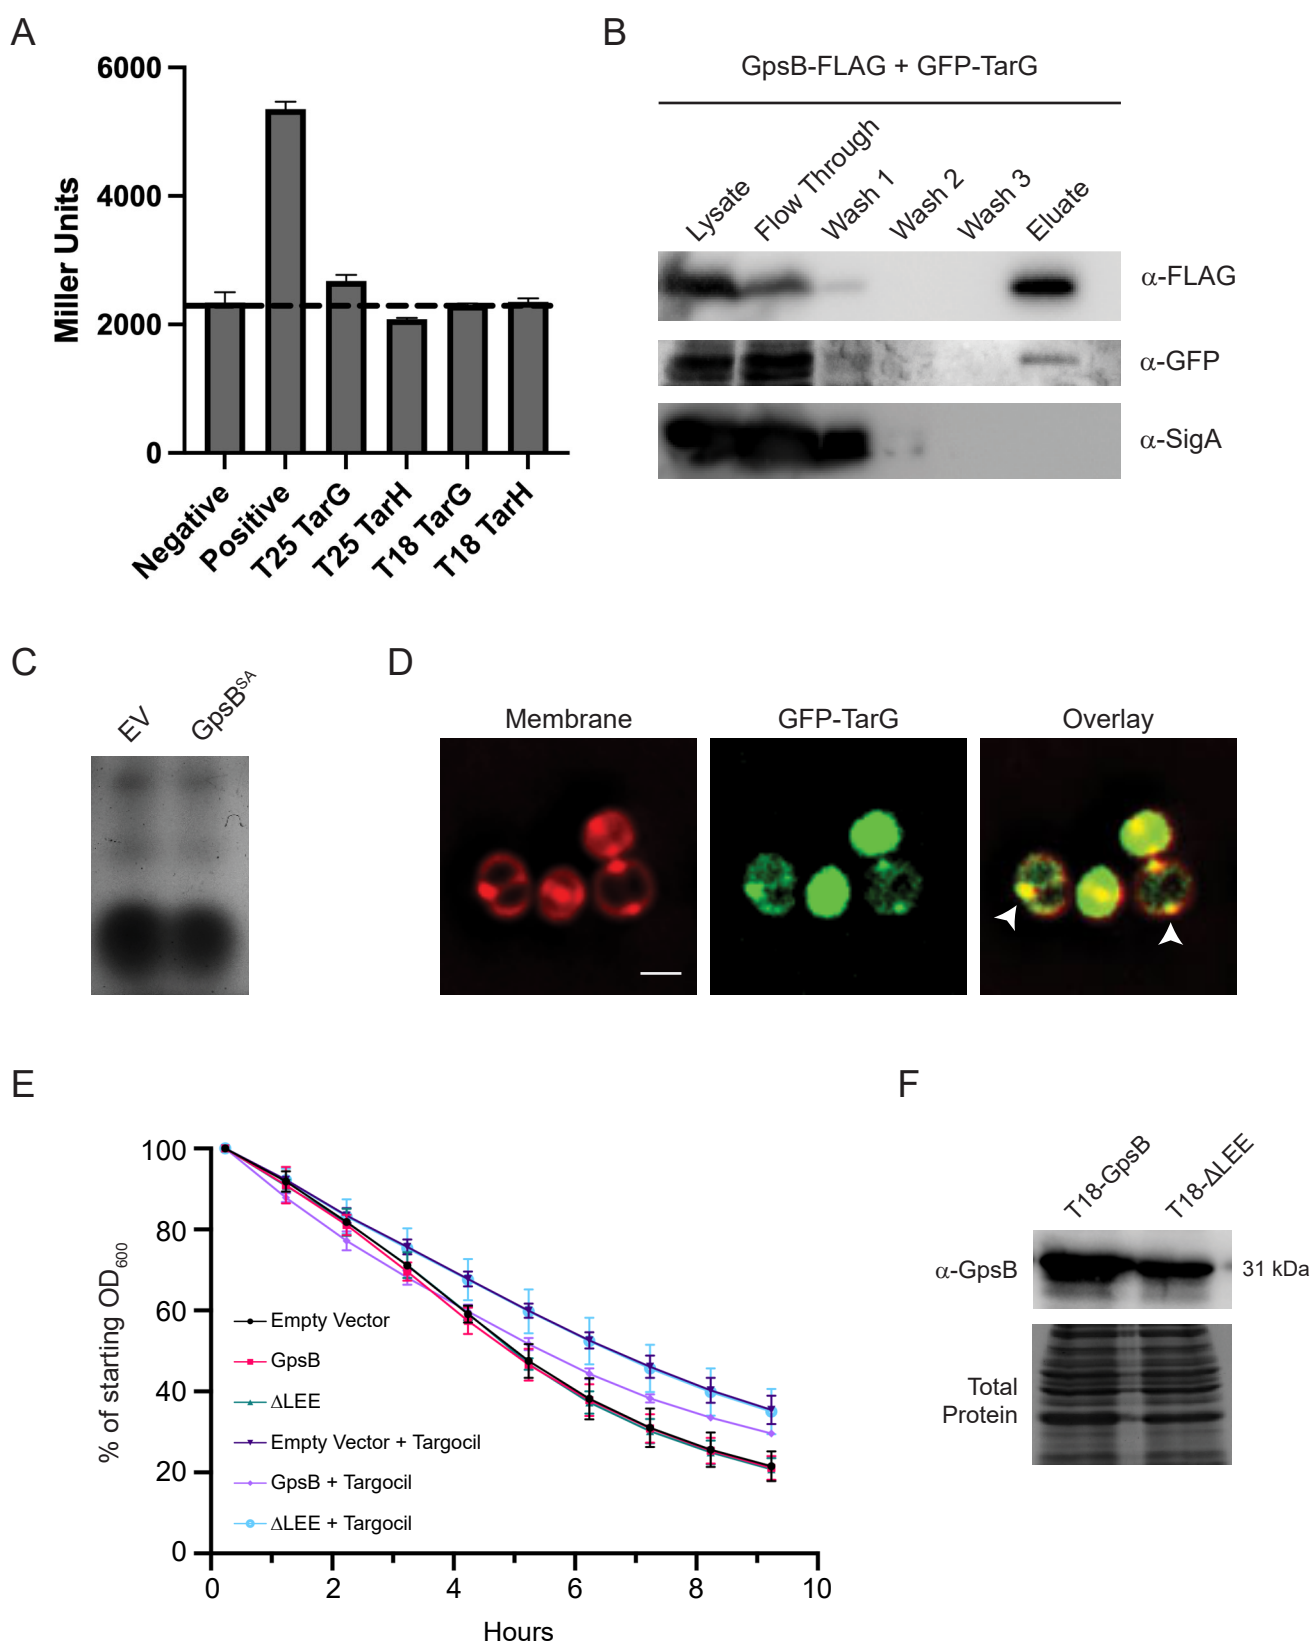

Figure S5

A

|         |                                                                                   |     |
|---------|-----------------------------------------------------------------------------------|-----|
| Bs-TagH | -----MKLKVSFRNVSKQYHLYKKQSDKIKGLFFPAKD--NGFFAVRNVSFDVYEGETIG                      | 53  |
| Sa-TarH | -----MNVSVNIKNVTKYRIYRTNKERMKDALIPKHK--KTFALDDISLKAYEGDVIG                        | 54  |
| Ef-TagH | MKKVEKEIKVRSTLVTKYDLYKKKSDKVKALFKFYHRNVPRFWALKGVSEVRAGESVG                        | 60  |
| Lm-TagH | -----MKVSPKHSKEYDLYQNKSDKIKGLFLPKSRVQSFWALRNVCFDVYDGETVG                          | 53  |
|         | :* : * : * : * : * : * : * : * : * : * : * : * : * : * : * : * : * : * : *        |     |
| Bs-TagH | FVGINGSGKSTMSNLLAKIIPPTSGEIMNGQPSLIAIAAGLNNQLTGRDNVRLKCLMMG                       | 113 |
| Sa-TarH | LVGINGSGKSTLSNIIGGSLSPYGVKVDNRGEVSVIAISAGLSGQLTGIEIEFKMLCMG                       | 114 |
| Ef-TagH | IIGINGSGKSTLSNVIISGIIIPPTSGTMEVNGDTSIIAIGAGLKYQLTGLNIRLKLMSG                      | 120 |
| Lm-TagH | LIGINGSGKSTISNIMSGVIPPQTQGEVINGETSLIIAIVGLKGPLSGLENIRLKLMMHG                      | 113 |
|         | :*****:***: . : * * * : * : * : * : * : * : * : * : * : * : * : * : * : *         |     |
| Bs-TagH | LTNKEIDDMYDSIVEFAEIGDFINQPVKNYSSGMKSRGFAISVHIDPDILIIIDEALSVG                      | 173 |
| Sa-TarH | FKRKEIKAMTPKIIIEFSELGEFIYQPVKYSYSSGMRAKLGFSINITVNPDLIVIDEALSVG                    | 174 |
| Ef-TagH | MTNKEIDKKMDEIVAFADLGDFINQPVKYSYSSGMKSRGFAIAVHNDPDILIVIDEALSVG                     | 180 |
| Lm-TagH | LKGSQIDSLPSIIEFADIGDFINQPKNYSSGMKSRGFAISVHTDPDILVDEALSVG                          | 173 |
|         | : . : * . : * : * : * : * : * : * : * : * : * : * : * : * : * : * : * : * : * : * |     |
| Bs-TagH | DQTFYQKCDVRINEFKKQKTIFFVSHSIGQIEKMCDRVAMHMYGELRMFDETKTVVKEY                       | 233 |
| Sa-TarH | DQTPAQKCLDKIYEFKEQNKTIFFVSHNLGQVRQFCTKIAWIEGGKLDYGLDDVLPKY                        | 234 |
| Ef-TagH | DETFYQKCDVKIMEFKESGKTIFFVSHALGQVEKLCDRTIWMHMYGDLRMFPGTEEVMAEY                     | 240 |
| Lm-TagH | DQTFYQKCDVKINEFKAQKTIFFVSHSLGQVKSCLKIIMWHHGEVREIGDAAEVAEKY                        | 233 |
|         | * : * * * : * : * * * . : * * * : * : * : * : * : * : * : * : * : * : * : *       |     |
| Bs-TagH | KAFIDWFNKLKSKKEKETYKQTEERKKEDPEAFARFR-----KKKKKP                                  | 277 |
| Sa-TarH | EAFLNDFKSKKAEQKEFRNKLDERSFVIK-----                                                | 264 |
| Ef-TagH | RKFIDWPKKQPKKEQKAYQDKYKQKAFNLEKLAEKQDSDLKEQHLSEQMIQKNLKR                          | 300 |
| Lm-TagH | DEFVKWFNKQPN-----                                                                 | 245 |
|         | * : . : * : * : *                                                                 |     |
| Bs-TagH | KSLANAIQIAILSILTVFMAGTMFNAPLRTIASFGAIPQNEVKNHHDGAKGSEERLTA                        | 337 |
| Sa-TarH | -----                                                                             | 264 |
| Ef-TagH | TPLGKMTIIPTKGLLTLAIVGTLFCSLV----SFSGRSISYALKHPVDA-----IVQ                         | 348 |
| Lm-TagH | -----                                                                             | 245 |
| Bs-TagH | INKQGFIANEKAAAYKQGLKQKADVTLFPGTKVTVAAGKQAAKIKFDGHSYVVKQSAV                        | 397 |
| Sa-TarH | -----                                                                             | 264 |
| Ef-TagH | V-----FK-----                                                                     | 351 |
| Lm-TagH | -----                                                                             | 245 |
| Bs-TagH | ATNMKHAELHATAFTSYVSQNAASSYEFYFLKFLGDSSTSIQSKLNGYTEGNKADGRKTLN                     | 457 |
| Sa-TarH | -----                                                                             | 264 |
| Ef-TagH | -----                                                                             | 351 |
| Lm-TagH | -----                                                                             | 245 |
| Bs-TagH | FDYEKISYVLENDKATELIFHNISPINPASLSLSDSVLYDSSKKRFLVNTDDQVFAVDN                       | 517 |
| Sa-TarH | -----                                                                             | 264 |
| Ef-TagH | -----                                                                             | 351 |
| Lm-TagH | -----                                                                             | 245 |
| Bs-TagH | EEHTLTLMLK                                                                        | 527 |
| Sa-TarH | -----                                                                             | 264 |
| Ef-TagH | -----                                                                             | 351 |
| Lm-TagH | -----                                                                             | 245 |

B

|         |                                                                               |     |
|---------|-------------------------------------------------------------------------------|-----|
| Bs-TagG | MNDLLRILREQITSFPLILRLAAYETKSKYQMNLYGLVWQFLNPLIQMLAYWVFGMGIR                   | 60  |
| Sa-TarG | MSAIGTVFKEHVKNFYLIQRLAQFQVKIINHNSYLGVAWELINPMQIMVYWMVFLGLGIR                  | 60  |
| Ef-TagG | MKEIAAVIKEQFNHAGIIFRMSRYEDKATYQSHYLGAWQILNPAIQIGIYYLVFGLGVN                   | 60  |
| Lm-TagG | MKQVMEVIKEQIKNLPIMFRIARYEDKATYQSHYLGAWQILNPLIQIAIYYVFGFMGN                    | 60  |
|         | * . : : * : * : * : * : * : * : * : * : * : * : * : * : * : * : * : * : * : * |     |
| Bs-TagG | KGGPVTTGAGEVFFIWMLAGLIPWFFISPTILDGNSVFKRINMVAKMNFPISSLPSVA                    | 120 |
| Sa-TarG | SNAP----IHGVPFVYWLLVGISMWWFINQGILEGKAITQKFNQVSKMNFPLSIPTIYI                   | 116 |
| Ef-TagG | GN---RKVDGVPFIIWMLIGITAWFYINSSVLGASNSIHRQVGMVAKMKFPVSIPLPSIN                  | 116 |
| Lm-TagG | AK---SGS-DASYIEWMLAGIIPWFFISAVILQGANSIYKIGMVSVMNFPMSPILPNIT                   | 115 |
|         | . : : * : * : * : * . : * : : : . . . * : * : * : * : *                       |     |
| Bs-TagG | IASNLSYSYMMVYIIVLLVNGVFPVSHWLQYIYFICMIAFMFSFSLFNSTISVLIRD                     | 180 |
| Sa-TarG | VTSRFYGHGLLLLVIIACMFTGIYPSIHIQLLIYVPPFCFFLTASVTLTSTLGLVLRD                    | 176 |
| Ef-TagG | IISNLSSYIPMVAIVIGSLFLAGVSPTYVWVQFYIYFIAMVIFLFAFGLLNATITVLRD                   | 176 |
| Lm-TagG | IVSNLTSYFTMMVILGLLAINGTPIITIIYVWQYLYYFVAMIAFLFSVTLFNATISVLIRD                 | 175 |
|         | : * . : : : : : . * : : : * : * . : . : * : * : * : * : *                     |     |
| Bs-TagG | YQFLQAVTRLLFFLLPIFDVNAKLGQSHPELVPLVPLKLNPLFYIEGFRNSFLDGAFFF                   | 240 |
| Sa-TarG | TQMLMQAILRLIFYFSPILWLPKNHGI--SGLIHEMMKYNPVYFIAESYRAALYHEWYF                   | 234 |
| Ef-TagG | YHIFLQSVLRLLFYVSGPIWDINNRNM--PEWLKLLRLNPFYLLIEGFRDAFLSRGWVW                   | 234 |
| Lm-TagG | YYIMLQSVMRVLFYVTVGIVWNLET--ML--PQWLVDLLKLNPIYVVGNGFRETFLMNGKGF                | 232 |
|         | : : : * : * : * . * : : : : : * : * : * : * : * : * : * : * : * : * : *       |     |
| Bs-TagG | HDM-KYTLYFWLFTFLLLLVGSIHMKFRDKFVDFL                                           | 275 |
| Sa-TarG | MDHWKMLNLYNGFIVAIFFAIGAYLHMKYRDQFADF                                          | 270 |
| Ef-TagG | EKT-TYTLIFWGMTLLLIIGSHLHMKFRARFVDYI                                           | 269 |
| Lm-TagG | ESP-SYTMFYWLITLTLFVGATLHMKFRERFVDYL                                           | 267 |
|         | . . : : : . : : * : * : * : * : * : * : *                                     |     |

Figure S6

**Table S1** Strains and oligonucleotides used in this study.

Strains used in this study

| Species            | Strain | Genotype                                                                                                                 | Source                                    |
|--------------------|--------|--------------------------------------------------------------------------------------------------------------------------|-------------------------------------------|
| <i>B. subtilis</i> | PY79   | Wildtype                                                                                                                 | [1]                                       |
| <i>B. subtilis</i> | GG8    | <i>amyE::P<sub>hyperspank</sub>-gpsB<sup>SA</sup>-gfp</i>                                                                | [2]                                       |
| <i>B. subtilis</i> | PE448  | <i>amyE::P<sub>hyperspank</sub>-*gpsB<sup>SA-L35S</sup>-gfp</i>                                                          | [2]                                       |
| <i>B. subtilis</i> | PE377  | <i>amyE::P<sub>hyperspank</sub>-*gpsB<sup>SA-LEErpt</sup>-gfp</i>                                                        | This study                                |
| <i>B. subtilis</i> | CS89   | <i>amyE::P<sub>hyperspank</sub>-*gpsB<sup>SA-D41N</sup>-gfp</i>                                                          | This study                                |
| <i>B. subtilis</i> | CS90   | <i>amyE::P<sub>hyperspank</sub>-*gpsB<sup>SA-ΔLEE</sup>-gfp</i>                                                          | This study                                |
| <i>B. subtilis</i> | CS91   | <i>amyE::P<sub>hyperspank</sub>-*gpsB<sup>SA-R72H</sup>-gfp</i>                                                          | This study                                |
| <i>B. subtilis</i> | CS92   | <i>amyE::P<sub>hyperspank</sub>-*gpsB<sup>SA-Y14F</sup>-gfp</i>                                                          | This study                                |
| <i>B. subtilis</i> | CS93   | <i>amyE::P<sub>hyperspank</sub>-*gpsB<sup>SA-D41G</sup>-gfp</i>                                                          | This study                                |
| <i>B. subtilis</i> | LH72   | <i>bkdB::Tn917::amyE::P<sub>hyperspank</sub>-gpsB-gfp (specR)</i>                                                        | This study                                |
| <i>B. subtilis</i> | LH73   | <i>bkdB::Tn917::amyE::P<sub>hyperspank</sub>-gpsB-gfp (ermR)</i>                                                         | This study                                |
| <i>B. subtilis</i> | LH75   | <i>bkdB::Tn917::amyE::P<sub>hyperspank</sub>-gpsB-gfp<br/>amyE::P<sub>hyperspank</sub>-*gpsB<sup>SA-L35S</sup>-gfp</i>   | This study                                |
| <i>B. subtilis</i> | LH79   | <i>bkdB::Tn917::amyE::P<sub>hyperspank</sub>-gpsB-gfp<br/>amyE::P<sub>hyperspank</sub>-*gpsB<sup>SA-LEErpt</sup>-gfp</i> | This study                                |
| <i>B. subtilis</i> | LH76   | <i>bkdB::Tn917::amyE::P<sub>hyperspank</sub>-gpsB-gfp<br/>amyE::P<sub>hyperspank</sub>-*gpsB<sup>SA-D41N</sup>-gfp</i>   | This study                                |
| <i>B. subtilis</i> | LH78   | <i>bkdB::Tn917::amyE::P<sub>hyperspank</sub>-gpsB-gfp<br/>amyE::P<sub>hyperspank</sub>-*gpsB<sup>SA-ΔLEE</sup>-gfp</i>   | This study                                |
| <i>B. subtilis</i> | LH80   | <i>bkdB::Tn917::amyE::P<sub>hyperspank</sub>-gpsB-gfp<br/>amyE::P<sub>hyperspank</sub>-*gpsB<sup>SA-R72H</sup>-gfp</i>   | This study                                |
| <i>B. subtilis</i> | LH74   | <i>bkdB::Tn917::amyE::P<sub>hyperspank</sub>-gpsB-gfp<br/>amyE::P<sub>hyperspank</sub>-*gpsB<sup>SA-Y14F</sup>-gfp</i>   | This study                                |
| <i>B. subtilis</i> | LH77   | <i>bkdB::Tn917::amyE::P<sub>hyperspank</sub>-gpsB-gfp<br/>amyE::P<sub>hyperspank</sub>-*gpsB<sup>SA-D41G</sup>-gfp</i>   | This study                                |
| <i>B. subtilis</i> | RL4709 | <i>amyE::P<sub>hyperspank</sub>-gfp</i>                                                                                  | (R. Losick Lab)                           |
| <i>B. subtilis</i> | SK15   | <i>lacA::Pxyl-dcas9 amyE::Pveg-sgRNA (tagG)</i>                                                                          | This study; derived from BEC35710 (^BGSC) |
| <i>B. subtilis</i> | SK16   | <i>lacA::Pxyl-dcas9 amyE::Pveg-sgRNA (tagH)</i>                                                                          | This study; derived from BEC35700 (^BGSC) |
| <i>B. subtilis</i> | SK17   | <i>lacA::Pxyl-dcas9 amyE::Pveg-sgRNA (tagG);<br/>bkdB::Tn917::amyE::P<sub>hyperspank</sub>-gpsB-gfp</i>                  | This study                                |
| <i>B. subtilis</i> | SK18   | <i>lacA::Pxyl-dcas9 amyE::Pveg-sgRNA (tagH);<br/>bkdB::Tn917::amyE::P<sub>hyperspank</sub>-gpsB-gfp</i>                  | This study                                |
| <i>B. subtilis</i> | PE528  | <i>tagH::P<sub>xyt</sub>-gfp-tagH (1-648)</i>                                                                            | This study; derived from [3]              |
| <i>B. subtilis</i> | GG19   | <i>amyE::P<sub>hyperspank</sub>-gpsB<sup>BS</sup>-gfp</i>                                                                | [2]                                       |
| <i>S. aureus</i>   | SH1000 | Wildtype                                                                                                                 | [4]                                       |
| <i>S. aureus</i>   | RN4220 | Wildtype                                                                                                                 | Lab stock                                 |
| <i>S. aureus</i>   | SEJ1   | RN4220 Δspa                                                                                                              | [5]                                       |
| <i>S. aureus</i>   | PES5   | SH1000 with pCL15 Empty Vector                                                                                           | [2]                                       |
| <i>S. aureus</i>   | PE355  | RN4220 with pCL15 Empty Vector                                                                                           | [2]                                       |
| <i>S. aureus</i>   | PES6   | SH1000 pCL15 backbone <i>P<sub>spac</sub>-gpsB<sup>SA</sup>-gfp</i>                                                      | [2]                                       |
| <i>S. aureus</i>   | GG52   | RN4220 pCL15 backbone <i>P<sub>spac</sub>-gpsB<sup>SA</sup>-gfp</i>                                                      | [2]                                       |
| <i>S. aureus</i>   | PES13  | SH1000 pCL15 backbone <i>P<sub>spac</sub>-gpsB<sup>SA</sup></i>                                                          | [2]                                       |
| <i>S. aureus</i>   | GG51   | RN4220 pCL15 backbone <i>P<sub>spac</sub>-gpsB<sup>SA</sup></i>                                                          | [2]                                       |
| <i>S. aureus</i>   | LH36   | RN4220 pCL15 backbone <i>P<sub>spac</sub>-*gpsB<sup>SA L35S</sup>-gfp</i>                                                | [2]                                       |
| <i>S. aureus</i>   | LH35   | RN4220 pCL15 backbone <i>P<sub>spac</sub>-*gpsB<sup>SA LEErpt</sup>-gfp</i>                                              | This study                                |
| <i>S. aureus</i>   | LH19   | RN4220 pCL15 backbone <i>P<sub>spac</sub>-*gpsB<sup>SA D41N</sup>-gfp</i>                                                | This study                                |
| <i>S. aureus</i>   | LH17   | RN4220 pCL15 backbone <i>P<sub>spac</sub>-*gpsB<sup>SA ΔLEE</sup>-gfp</i>                                                | This study                                |
| <i>S. aureus</i>   | LH18   | RN4220 pCL15 backbone <i>P<sub>spac</sub>-*gpsB<sup>SA R72H</sup>-gfp</i>                                                | This study                                |
| <i>S. aureus</i>   | LH32   | RN4220 pCL15 backbone <i>P<sub>spac</sub>-*gpsB<sup>SA Y14F</sup>-gfp</i>                                                | This study                                |
| <i>S. aureus</i>   | LH20   | RN4220 pCL15 backbone <i>P<sub>spac</sub>-*gpsB<sup>SA D41G</sup>-gfp</i>                                                | This study                                |
| <i>S. aureus</i>   | LH136  | RN4220 pJB67 backbone <i>P<sub>cad</sub>-gfp-tarG</i>                                                                    | This study                                |
| <i>S. aureus</i>   | AH2    | RN4220 pCL15 backbone <i>P<sub>spac</sub>-*gpsB<sup>SA ΔLEE</sup></i>                                                    | This study                                |
| <i>S. aureus</i>   | LH140  | RN4220 with pCL15 Empty Vector                                                                                           | This study                                |
| <i>S. aureus</i>   | LH141  | RN4220 Δspa pCL15 backbone <i>P<sub>spac</sub>-gpsB<sup>SA</sup>-gfp</i>                                                 | This study                                |
| <i>S. aureus</i>   | LH162  | RN4220 Δspa pCL15 backbone <i>P<sub>spac</sub>-*gpsB<sup>SA L35S</sup>-gfp</i>                                           | This study                                |
| <i>S. aureus</i>   | LH144  | RN4220 Δspa pCL15 backbone <i>P<sub>spac</sub>-*gpsB<sup>SA LEErpt</sup>-gfp</i>                                         | This study                                |
| <i>S. aureus</i>   | LH160  | RN4220 Δspa pCL15 backbone <i>P<sub>spac</sub>-*gpsB<sup>SA D41N</sup>-gfp</i>                                           | This study                                |
| <i>S. aureus</i>   | LH142  | RN4220 Δspa pCL15 backbone <i>P<sub>spac</sub>-*gpsB<sup>SA ΔLEE</sup>-gfp</i>                                           | This study                                |

|                  |        |                                                                                                                                                                                                                                |            |
|------------------|--------|--------------------------------------------------------------------------------------------------------------------------------------------------------------------------------------------------------------------------------|------------|
| <i>S. aureus</i> | LH143  | RN4220 $\Delta$ spa pCL15 backbone $P_{spac^-}$ * $gpsB^{SA R72H}$ -gfp                                                                                                                                                        | This study |
| <i>S. aureus</i> | LH161  | RN4220 $\Delta$ spa pCL15 backbone $P_{spac^-}$ * $gpsB^{SA Y14F}$ -gfp                                                                                                                                                        | This study |
| <i>S. aureus</i> | LH159  | RN4220 $\Delta$ spa pCL15 backbone $P_{spac^-}$ * $gpsB^{SA D41G}$ -gfp                                                                                                                                                        | This study |
| <i>E. coli</i>   | BTH101 | Adenylate cyclase deficient reporter strain for BACTH; F', <i>cya-99</i> , <i>araD139</i> , <i>galE15</i> , <i>galK16</i> , <i>rpsL1</i> ( <i>Str<sup>R</sup></i> ), <i>hsdR2</i> , <i>mcrA1</i> , <i>mcrB1</i> , <i>relA1</i> | [6]        |
| <i>E. coli</i>   | LH39   | T18-linker $gpsB^{SA}$                                                                                                                                                                                                         | This study |
| <i>E. coli</i>   | LH40   | T25-linker $gpsB^{SA}$                                                                                                                                                                                                         | This study |
| <i>E. coli</i>   | LH43   | T18-linker * $gpsB^{SA LEErpt}$                                                                                                                                                                                                | This study |
| <i>E. coli</i>   | LH44   | T25-linker * $gpsB^{SA LEErpt}$                                                                                                                                                                                                | This study |
| <i>E. coli</i>   | LH45   | T18-linker * $gpsB^{SA L35S}$                                                                                                                                                                                                  | This study |
| <i>E. coli</i>   | LH46   | T25-linker * $gpsB^{SA L35S}$                                                                                                                                                                                                  | This study |
| <i>E. coli</i>   | LH47   | T18-linker * $gpsB^{SA \Delta LEE}$                                                                                                                                                                                            | This study |
| <i>E. coli</i>   | LH48   | T25-linker * $gpsB^{SA \Delta LEE}$                                                                                                                                                                                            | This study |
| <i>E. coli</i>   | LH49   | T18-linker * $gpsB^{SA Y14F}$                                                                                                                                                                                                  | This study |
| <i>E. coli</i>   | LH50   | T25-linker * $gpsB^{SA Y14F}$                                                                                                                                                                                                  | This study |
| <i>E. coli</i>   | LH51   | T18-linker * $gpsB^{SA D41G}$                                                                                                                                                                                                  | This study |
| <i>E. coli</i>   | LH52   | T25-linker * $gpsB^{SA D41G}$                                                                                                                                                                                                  | This study |
| <i>E. coli</i>   | LH53   | T18-linker * $gpsB^{SA D41N}$                                                                                                                                                                                                  | This study |
| <i>E. coli</i>   | LH54   | T25-linker * $gpsB^{SA D41N}$                                                                                                                                                                                                  | This study |
| <i>E. coli</i>   | LH55   | T18-linker * $gpsB^{SA R72H}$                                                                                                                                                                                                  | This study |
| <i>E. coli</i>   | LH56   | T25-linker * $gpsB^{SA R72H}$                                                                                                                                                                                                  | This study |
| <i>E. coli</i>   | SKB3   | T18-linker <i>tarH</i>                                                                                                                                                                                                         | This study |
| <i>E. coli</i>   | SKB4   | T25-linker <i>tarH</i>                                                                                                                                                                                                         | This study |
| <i>E. coli</i>   | SKB1   | T18-linker <i>tarG</i>                                                                                                                                                                                                         | This study |
| <i>E. coli</i>   | SKB2   | T25-linker <i>tarG</i>                                                                                                                                                                                                         | This study |
| <i>E. coli</i>   | PE87   | pUT25-zip                                                                                                                                                                                                                      | [6]        |
| <i>E. coli</i>   | PE88   | pUT18-zip                                                                                                                                                                                                                      | [6]        |
| <i>E. coli</i>   | PE84   | pEB355                                                                                                                                                                                                                         | [6]        |
| <i>E. coli</i>   | PE83   | pEB354                                                                                                                                                                                                                         | [6]        |
| <i>E. coli</i>   | pCL15  | pCL15                                                                                                                                                                                                                          | [7]        |
| <i>E. coli</i>   | pLH5   | pCL15 backbone $P_{spac^-}$ * $gpsB^{SA \Delta LEE}$ -gfp                                                                                                                                                                      | This study |
| <i>E. coli</i>   | pLH6   | pCL15 backbone $P_{spac^-}$ * $gpsB^{SA R72H}$ -gfp                                                                                                                                                                            | This study |
| <i>E. coli</i>   | pLH7   | pCL15 backbone $P_{spac^-}$ * $gpsB^{SA D41N}$ -gfp                                                                                                                                                                            | This study |
| <i>E. coli</i>   | pLH8   | pCL15 backbone $P_{spac^-}$ * $gpsB^{SA D41G}$ -gfp                                                                                                                                                                            | This study |
| <i>E. coli</i>   | pLH13  | pCL15 backbone $P_{spac^-}$ * $gpsB^{SA Y14F}$ -gfp                                                                                                                                                                            | This study |
| <i>E. coli</i>   | pPE78  | pCL15 backbone $P_{spac^-}$ * $gpsB^{SA LEErpt}$ -gfp                                                                                                                                                                          | This study |
| <i>E. coli</i>   | pPE80  | pCL15 backbone $P_{spac^-}$ * $gpsB^{SA L35S}$ -gfp                                                                                                                                                                            | This study |
| <i>E. coli</i>   | pPE46  | pCL15 backbone $P_{spac^-}$ * $gpsB^{SA}$ -gfp                                                                                                                                                                                 | [2]        |
| <i>E. coli</i>   | pPE45  | pCL15 backbone $P_{spac^-}$ * $gpsB^{SA}$                                                                                                                                                                                      | [2]        |
| <i>E. coli</i>   | pLH64  | pJB67 backbone $P_{cad}$ -gfp- <i>tarG</i>                                                                                                                                                                                     | This study |
| <i>E. coli</i>   | pAH1   | pCL15 backbone $P_{spac^-}$ * $gpsB^{SA \Delta LEE}$                                                                                                                                                                           | This study |

\*denotes mutant  $gpsB^{SA}$

^BGSC - Bacillus Genetic Stock Center

### Oligonucleotides used in this study

| Primer | Sequence (5' to 3')                                         |
|--------|-------------------------------------------------------------|
| oP36   | AAAAAGCTTACATAAGGAGGAACACTACTATGTCAGATGTTTCATTGAAATTATCAGCA |
| oP38   | AAAGCATGCTATTTACCAAATACAGCTTTTTCTAAGTTTGA                   |
| oGG2   | AAAGTCGACTTATTTGTATAGTTCATCCATGCC                           |
| BTH11  | AATAAGAATTCATGTCAGATGTTTCATTGAAATTATCAGC                    |
| BTH12  | GCTGTATTTGGTAAATAACTCGAGTTATT                               |
| BTH61  | AATAAGAATTCATGAACGTTTTCCGGTAAACATTAATAAATG                  |
| BTH62  | AATAACTCGAGTTATTTAATAACGAAGCGGGACTCATCG                     |
| BTH63  | AATAAGAATTCATGTCAGCAATAGGAACAG                              |
| BTH64  | AATAACTCGAGTTACAAGAAGTCTGCAAATTGATCTC                       |
| oLH11  | AATAAGTCGACACATAAGGAGGAACACTACTATGAGTAAAGGAGAAGAACTTTTCAC   |
| oLH12  | AATAAGGATCCTTTGTATAGTTTCATCCATGCC                           |
| oLH13  | AATAAGGATCCATGTCAGCAATAGGAACAG                              |
| oLH14  | AATAAGAATTCCTTACAAGAAGTCTGCAAATTG                           |

## References

1. Youngman P, Perkins JB, Losick R. Construction of a cloning site near one end of Tn917 into which foreign DNA may be inserted without affecting transposition in *Bacillus subtilis* or expression of the transposon-borne *erm* gene. *Plasmid*. 1984;12(1):1-9. Epub 1984/07/01. doi: 10.1016/0147-619x(84)90061-1. PubMed PMID: 6093169.
2. Eswara PJ, Brzozowski RS, Viola MG, Graham G, Spanoudis C, Trebino C, et al. An essential *Staphylococcus aureus* cell division protein directly regulates FtsZ dynamics. *Elife*. 2018;7. Epub 2018/10/03. doi: 10.7554/eLife.38856. PubMed PMID: 30277210; PubMed Central PMCID: PMC6168285.
3. Formstone A, Carballido-Lopez R, Noirot P, Errington J, Scheffers DJ. Localization and interactions of teichoic acid synthetic enzymes in *Bacillus subtilis*. *J Bacteriol*. 2008;190(5):1812-21. Epub 2007/12/25. doi: 10.1128/JB.01394-07. PubMed PMID: 18156271; PubMed Central PMCID: PMC2258661.
4. Horsburgh MJ, Aish JL, White IJ, Shaw L, Lithgow JK, Foster SJ.  $\sigma^B$  modulates virulence determinant expression and stress resistance: characterization of a functional *rsbU* strain derived from *Staphylococcus aureus* 8325-4. *J Bacteriol*. 2002;184(19):5457-67. Epub 2002/09/10. doi: 10.1128/JB.184.19.5457-5467.2002. PubMed PMID: 12218034; PubMed Central PMCID: PMC135357.
5. Yu W, Missiakas D, Schneewind O. Septal secretion of protein A in *Staphylococcus aureus* requires SecA and lipoteichoic acid synthesis. *Elife*. 2018;7. Epub 2018/05/15. doi: 10.7554/eLife.34092. PubMed PMID: 29757141; PubMed Central PMCID: PMC5962339.
6. Battesti A, Bouveret E. The bacterial two-hybrid system based on adenylate cyclase reconstitution in *Escherichia coli*. *Methods*. 2012;58(4):325-34. Epub 2012/07/31. doi: 10.1016/j.ymeth.2012.07.018. PubMed PMID: 22841567.
7. Luong TT, Lee CY. The *arl* locus positively regulates *Staphylococcus aureus* type 5 capsule via an *mgrA*-dependent pathway. *Microbiology (Reading)*. 2006;152(Pt 10):3123-31. Epub 2006/09/29. doi: 10.1099/mic.0.29177-0. PubMed PMID: 17005991.
